# Supplementary material for: Growth and characterization of zeolitic imidazolate framework-8 nanocrystalline layers on microstructured surfaces for liquid crystal alignment
Source: Royal Society of Chemistry journal article supplement (doi:10.1039/c5ra25794h), 2016-01-01
Supplement: c5ra25794h1.pdf [file c5ra25794h1.pdf]

## Electronic Supporting Information

### Growth and Characterization of Zeolitic Imidazolate Framework-8 Nanocrystalline Layers on Microstructured Surfaces for Liquid Crystal Alignment

Lu-Jian Chen,<sup>\*a, b</sup> Bin Luo,<sup>a</sup> Wen-Song Li,<sup>a</sup> Can Yang,<sup>a</sup> Tao Ye,<sup>b, d</sup> Sen-Sen Li,<sup>a</sup> Xiao-Zhong Wang,<sup>a</sup> Yuan-Jing Cui,<sup>b, c</sup> Han-Ying Li,<sup>b, d</sup> and Guo-Dong Qian<sup>b, c</sup>

<sup>a</sup> Department of Electronic Engineering, School of Information Science and Engineering, Xiamen University, Xiamen 361005, China

<sup>b</sup> State Key Laboratory of Silicon Materials, Zhejiang University, Hangzhou, 310027, China

<sup>c</sup> Cyrus Tang Center for Sensor Materials and Applications, Department of Materials Science and Engineering, Zhejiang University, Hangzhou, 310027, China

<sup>d</sup> MOE Key Laboratory of Macromolecular Synthesis and Functionalization, Department of Polymer Science and Engineering, Zhejiang University, Hangzhou, 310027, China

E-mail: [lujianchen@xmu.edu.cn](mailto:lujianchen@xmu.edu.cn)

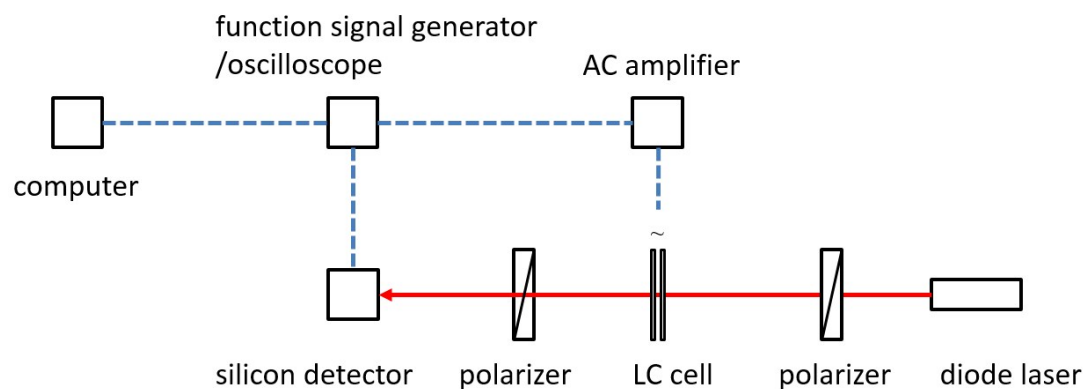

Fig. S1 Schematic of the electro-optical experimental set-up used in this work

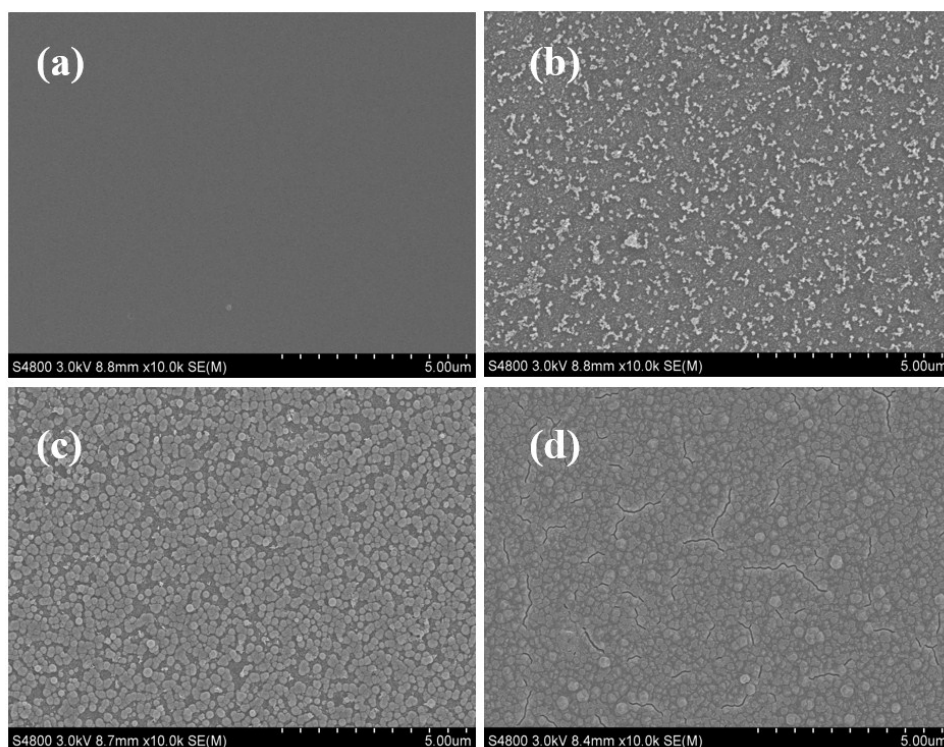

Fig. S2 SEM top views of ZIF-8 layer prepared on pristine sol-gel films (a) after 1 cycle growth of 5 min (b), 10 min (c), and 30 min (d)

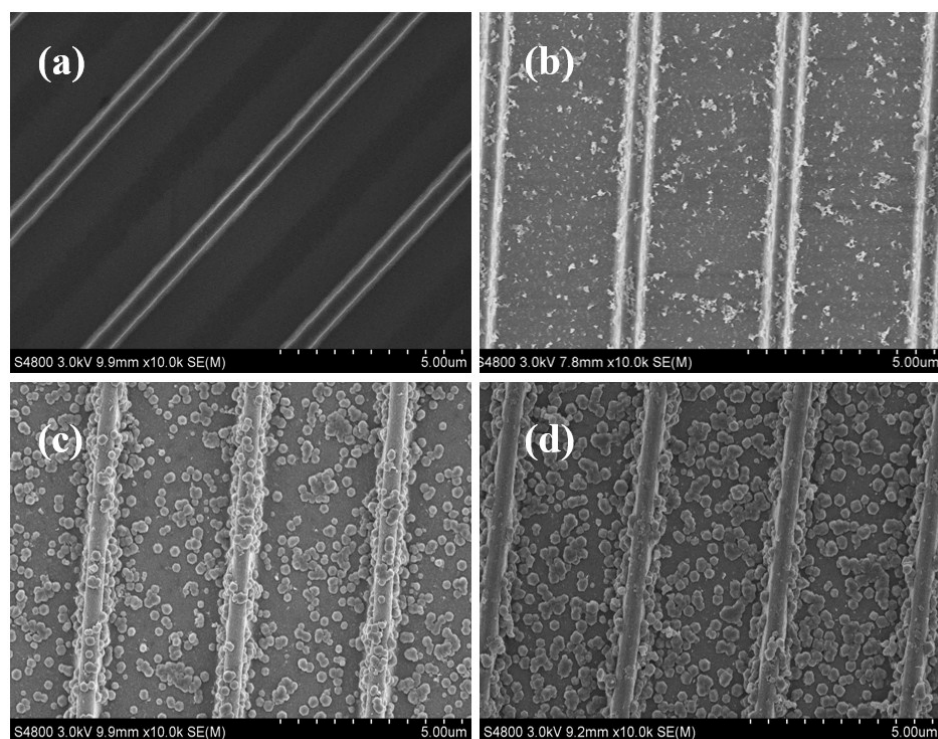

Fig. S3 SEM top views of ZIF-8 layer prepared on patterned sol-gel films with grating periods ( $\Lambda$ ) of 3.9 μm (a) after 1 cycle growth of 10 min (b), 30 min (c) and 60 min (d)
